# Supplementary material
Source: Research Square preprint supplement (doi:10.21203/rs.3.rs-9272750/v1)
Supplement: Supplementary file 1 [file 8e7f2cfd3e1826cf70c868e7.docx]

Changes in Seasonal Patterns and Meteorologic Sensitivity of Other Infectious Diarrhea and Norovirus Genogroups after the 2022 Breakpoint, Shenzhen, China, 2013–2025

**Table S1. Breakpoint comparison for monthly OID interrupted time-series models**

| **Candidate breakpoint** | **BIC** | **R-squared** | **Chow F** | **p value** | **Interpretation** |
| --- | --- | --- | --- | --- | --- |
| 2020-01 | 2764.02 | 0.454 | 5.80 | <0.001 | Significant, but weaker overall fit than January 2022 |
| 2021-01 | 2763.73 | 0.456 | 6.18 | <0.001 | Highest Chow F among candidates, but poorer overall fit |
| 2022-01 | 2743.31 | 0.524 | 2.90 | 0.003 | Best combined support; retained as the main breakpoint |
| 2022-03 | 2749.25 | 0.505 | 3.76 | <0.001 | Nearby significant alternative breakpoint |
| 2022-07 | 2749.05 | 0.506 | 4.07 | <0.001 | Nearby significant alternative breakpoint |
| 2023-01 | 2748.88 | 0.507 | 2.87 | 0.003 | Later significant alternative breakpoint |

*Note. January 2022 was retained as the main breakpoint because it provided the best combined support by Bayesian information criterion and R-squared, even though adjacent breakpoints also had statistically significant Chow tests.*

**Table S2. Full interrupted time-series coefficient table for monthly OID counts**

| **Term** | **Coefficient** | **SE** | **t value** | **p value** | **Interpretation** |
| --- | --- | --- | --- | --- | --- |
| Intercept (beta0) | 2307.53 | 358.19 | 6.44 | <0.001 | Baseline monthly level |
| Time trend (beta1) | 16.17 | 5.79 | 2.79 | 0.006 | Gradual pre-break increase |
| Post-break level change (beta2) | -20171.79 | 3004.02 | -6.71 | <0.001 | Immediate downward level displacement at breakpoint coding |
| Post-break slope change (beta3) | 164.92 | 23.72 | 6.95 | <0.001 | Strong slope acceleration after January 2022 |
| sin(2*pi*t/12) | -328.92 | 216.85 | -1.52 | 0.132 | Not statistically significant |
| cos(2*pi*t/12) | 1103.92 | 214.67 | 5.14 | <0.001 | Dominant annual seasonal component |
| sin(4*pi*t/12) | -27.50 | 216.35 | -0.13 | 0.899 | Not statistically significant |
| cos(4*pi*t/12) | 702.57 | 214.54 | 3.27 | 0.001 | Semiannual seasonal component |
| sin(6*pi*t/12) | -277.07 | 215.92 | -1.28 | 0.202 | Not statistically significant |
| cos(6*pi*t/12) | 238.34 | 214.58 | 1.11 | 0.269 | Not statistically significant |

*Note. Model summary: n=151 months, breakpoint at 2022-01, R-squared=0.524, adjusted R-squared=0.494, F=17.27, model p<0.001. The negative beta2 coefficient reflects model coding of the segmented transition and should not be interpreted in isolation from the strongly positive post-break slope change.*

**Table S3. Supplementary environmental-analysis settings and period-stratified correlations**

| **Component** | **Specification or result** | **Value** | **Comment** |
| --- | --- | --- | --- |
| Environmental time scale | Observation window | 2013-01 to 2025-07 | 151 monthly observations overall |
| Descriptive periods | Pre-COVID / During-COVID / Post-COVID | 84 / 36 / 31 months | Used for seasonal comparison and period-stratified environmental summaries |
| Lag framework | Maximum lag | 0-6 months | Displayed in Figure S1 |
| Exposure variables | Temperature / relative humidity / rainfall | 3 variables | Monthly summaries and lag-response panels |
| OID correlations | Pre-COVID temperature / humidity / rainfall | -0.486 / -0.553 / -0.224 | All inverse; rainfall weak |
| OID correlations | Post-COVID temperature / humidity / rainfall | -0.320 / -0.257 / -0.194 | Attenuated and not statistically significant |
| GI correlations | Post-COVID temperature | -0.419 | Inverse association emerged after 2022 |
| GII correlations | Post-COVID humidity | -0.431 | Inverse humidity association strengthened after 2022 |
| GI+GII correlations | Stable pattern | No consistent correlation | Mixed detections remained heterogeneous |

*Note. These supplementary results support the main-text conclusion that environmental association changed across periods, but they remain ecological summaries rather than formal causal estimates. Figure S1 and Table S3 summarize the most interpretable lag-pattern evidence; if reviewers require them, the full lag-specific coefficient exports can be supplied separately as data files.*

**Table S4. Breakpoint-stratified generalized additive model summaries**

| **Series** | **Pre-break n** | **Post-break n** | **Pre-break**  **mean** **± SD** | **Post-break**  **mean ± SD** | **R-squared change** | **Interaction contrast** |
| --- | --- | --- | --- | --- | --- | --- |
| OID | 108 | 43 | 3172.9 ± 2180.6 | 5478.0 ± 2886.6 | 0.389 🡪 0.120 (delta -0.269) | beta(interaction) contrast -0.049 |
| GI | 108 | 43 | 3.5 ± 6.6 | 14.3 ± 11.0 | 0.041 🡪 0.145 (delta +0.105) | beta(interaction) contrast +0.055 |
| GII | 108 | 43 | 13.5 ± 30.1 | 48.0 ± 51.5 | 0.177 🡪 0.184 (delta +0.007) | beta(interaction) contrast +0.003 |
| GI+GII | 108 | 43 | 2.8 ± 5.6 | 31.8 ± 24.6 | 0.073 🡪 0.088 (delta +0.015) | beta(interaction) contrast +0.076 |

*Note. Smoothing specification from the statistical appendix: spline-based smooth terms with k=5 for temperature and humidity plus a tensor-product interaction. Because these models were fitted separately by period and diagnostics showed residual limitations, they are interpreted as exploratory response-surface comparisons rather than definitive effect-modification tests.*

**Table S5. Supplementary model diagnostic summary**

| **Model family** | **Series** | **Diagnostic** | **Result** | **Interpretation** |
| --- | --- | --- | --- | --- |
| ITS | OID | Ljung-Box test (lag 12) | p<0.001 | Residual autocorrelation remained after seasonal adjustment |
| ITS | OID | ACF/PACF | Early lag spikes present | Short-lag serial dependence persisted |
| GAM | OID | Shapiro-Wilk / Breusch-Pagan | p<0.001 / p=0.015 | Residual non-normality and heteroscedasticity |
| GAM | GI | Shapiro-Wilk / Breusch-Pagan | p<0.001 / p=0.013 | Residual non-normality and heteroscedasticity |
| GAM | GII | Shapiro-Wilk / Breusch-Pagan | p<0.001 / p=0.045 | Residual non-normality and heteroscedasticity |
| GAM | GI+GII | Shapiro-Wilk / Breusch-Pagan | p<0.001 / p=0.027 | Residual non-normality and heteroscedasticity |
| GAM | All series | Condition number / max concurvity | 4.3 / 0.575 | No major condition-number instability by this metric; moderate concurvity suggests overlapping smooth information |

*Note. Diagnostic plots are reproduced in Figures S2-S3. These outputs support conservative interpretation of breakpoint coefficients and response-surface changes.*

Figure S1. Supplementary environmental analyses for other infectious diarrhea (OID) and norovirus analytic series. In retrospective ecological time-series study of surveillance and meteorologic data from Shenzhen, left panels summarize the direction of lag-response patterns for temperature, humidity, and rainfall; middle panels show illustrative lag-response curves across 0-6 weeks under contrasting temperature conditions; and right panels compare pre-COVID and post-COVID Pearson correlations. These analyses are descriptive and are intended to support, not replace, the main breakpoint and response-surface results. GI, norovirus genogroup I; GII, norovirus genogroup II.

Figure S2. Generalized additive model diagnostics for other infectious diarrhea (OID), GI-positive, GII-positive, and mixed GI+GII-positive series. In breakpoint-stratified generalized additive modeling of surveillance and meteorologic data from Shenzhen, quantile-quantile plots, residual-versus-fitted plots, condition-number summaries, and concurvity estimates are provided for transparency; because residual non-normality, heteroscedasticity, and moderate concurvity were present, Figure 3 is interpreted as an exploratory response-surface comparison rather than a formal causal model. GI, norovirus genogroup I; GII, norovirus genogroup II.

Figure S3. Interrupted time-series residual autocorrelation diagnostics for the main other infectious diarrhea (OID) segmented model. In interrupted time-series analysis of monthly surveillance data from Shenzhen, residual time-series, autocorrelation, and partial-autocorrelation plots are shown together with the Ljung-Box test to document remaining serial dependence after seasonal adjustment.
